# Supplementary material for: Bayesian belief network modelling of household food security in rural South Africa
Source: PubMed Central journal article supplement (PMC8130258; doi:10.1186/s12889-021-10938-y), 2021-05-17
Supplement: 12889_2021_10938_MOESM1_ESM.pdf [file 12889_2021_10938_MOESM1_ESM.pdf]

18 forage for food from the local environment, receive aid from the community, or  
19 receive government child welfare grants; as well as on their socio-economic status,  
20 how well educated the household members are, what the gender of the household  
21 head is, how many individuals in the household are too young or old to work, and how  
22 many working age adults live in the household (defined as aged 15-59 as individuals  
23 make their greatest economic contribution to the household from the age of 15 [1],  
24 and the age at which individuals in South Africa can claim an older persons grant  
25 is 60 [2]) [1, 3–9]. Whether a household forages for food from the environment was  
26 found to be influenced by the numbers of individuals in the household too young  
27 or old to work, as well as the number at working age [10], and is obviously also  
28 affected by the level of local vegetation in the local area. Whether a household is  
29 likely to receive communal aid (e.g. food or money) was found to be influenced by  
30 their socio-economic status, the gender of their household head, and whether the  
31 household contains refugees (i.e. individuals not defined in the dataset as South  
32 African nationals, usually due to being Mozambican refugees) [7, 11]. Households  
33 selling crops and livestock is obviously influenced by whether they grow or rear  
34 them in the first place. Whether households claim child support grants was found  
35 to be influenced by how well employed the household members are and their socio-  
36 economic status (which is unsurprising as the grant is means tested [12]), as well as  
37 their refugee status and obviously by whether the household has any children [6, 7, 13].  
38 Whether the household grows crops and livestock was found to be influenced by  
39 their socio-economic status, how good their access to water is, and whether they  
40 have enough household members to perform the farming [3, 6]. Household socio-  
41 economic status was found to be influenced by the household levels of employment  
42 and education, as well as their refugee status and the gender of their household  
43 head [6].

44 These relationships gave us a causal ordering of the different household variables, as  
45 shown by the breaking up into levels of the variables in Tables 1 to 9. The variables  
46 of each level can only be caused by a variable in a higher numbered level, and can  
47 only cause those in a lower numbered level, according to this ordering. For example,  
48 water access in level 5 (Table 5) is possibly a cause of variables such as use of

49 crops and livestock, use of wild foods, and food security itself which are all in lower  
50 numbered levels, but is disallowed from causing variables such as socio-economic  
51 status, refugee status, or education level which are in higher numbered levels. This  
52 ordering was important when attempting to ensure a causal structure when eliciting  
53 the network structure from experts.

| Variable         | Definition                                                                                    | States                                                          | Data source                                                         |
|------------------|-----------------------------------------------------------------------------------------------|-----------------------------------------------------------------|---------------------------------------------------------------------|
| Food<br>insecure | Whether the<br>household has<br>or has not had<br>enough to eat<br>over the<br>previous year. | 0 - had enough to<br>eat.<br>1 - did not have<br>enough to eat. | NotEatYear variable<br>in the Agincourt<br>Food Security<br>module. |

**Table 1:** Agincourt food security belief network variables on level 1 of the causal ordering. The data source specifies how the variable is calculated from the data, and the states specify how the discrete variable states relate to the values resulted from the calculations described in the data source.

| Variable                | Definition                                                                     | States                                                                                                      | Data source                                                                                |
|-------------------------|--------------------------------------------------------------------------------|-------------------------------------------------------------------------------------------------------------|--------------------------------------------------------------------------------------------|
| Use of wild foods       | Whether the household uses wild foods.                                         | 0 - do not use wild foods.<br>1 - gather wild foods OR wild herbs.<br>2 - gather wild foods AND wild herbs. | Sum of the SupGather and SupGatherHerbs variables from the Agincourt Food Security module. |
| Receipt of communal aid | Whether the household gets financial aids from friends, neighbours, or family. | 0 - receive no aid.<br>1 - receive aid.                                                                     | SupDonate variable from the Agincourt Food Security module.                                |

**Table 2:** Agincourt food security belief network variables on level 2 of the causal ordering. The data source specifies how the variable is calculated from the data, and the states specify how the discrete variable states relate to the values resulted from the calculations described in the data source.

| Variable                       | Definition                                                                 | States                                                                                                                      | Data source                                                                                                                                                          |
|--------------------------------|----------------------------------------------------------------------------|-----------------------------------------------------------------------------------------------------------------------------|----------------------------------------------------------------------------------------------------------------------------------------------------------------------|
| Local vegetation level         | Amount of vegetation that grows in the local area of the household.        | 1 - up to 0.161.<br>2 - 0.161-0.302.<br>3 - 0.302-0.443.<br>4 - 0.443-0.584.<br>5 - 0.584-0.725.<br>6 - greater than 0.725. | Sum of the average NDVI values from the MODIS Terra satellite data in a 2000km by 2000km area around the household divided by the number of households in that area. |
| Selling of crops and livestock | Whether the household sells crops or livestock to supplement their income. | 0 - sell no crops or livestock.<br>1 - sell crops or livestock.                                                             | Sum of the SupSellGoods and SupSellStock variables from the Agincourt Food Security module.                                                                          |
| Child grant status             | Number of child grants the household receives.                             | State is equal to number of grants received that year.                                                                      | Count of grants received using the ReceivedYear variable from the Agincourt Child Grant module.                                                                      |

**Table 3:** Agincourt food security belief network variables on level 3 of the causal ordering. The data source specifies how the variable is calculated from the data, and the states specify how the discrete variable states relate to the values resulted from the calculations described in the data source. Value intervals are inclusive of the upper values.

| Variable                   | Definition                                                            | States                                                                                                          | Data source                                                                                                                                                                                                         |
|----------------------------|-----------------------------------------------------------------------|-----------------------------------------------------------------------------------------------------------------|---------------------------------------------------------------------------------------------------------------------------------------------------------------------------------------------------------------------|
| Number of dependents       | Number of household members aged less than 15 or greater than 59.     | 1 - up to 9.5.<br>2 - 9.5-19.0.<br>3 - 19.0-28.5.<br>4 - 28.5-38.0.<br>5 - 38.0-47.5.<br>6 - greater than 47.5. | Count of household members (membership counted at midyear) with the appropriate age (calculated at midyear) in the Agincourt dataset.                                                                               |
| Use of crops and livestock | Whether the household grows its own crops or keeps its own livestock. | 0-7+.                                                                                                           | Sum of the MaizePlot, MaizeField, OtherCropsPlot, and OtherCropsField variables from the Agincourt Food Security module with the Cattle, Goats, Poultry, and Pigs variables from the Agincourt Asset Status module. |

**Table 4:** Agincourt food security belief network variables on level 4 of the causal ordering. The data source specifies how the variable is calculated from the data, and the states specify how the discrete variable states relate to the values resulted from the calculations described in the data source. Value intervals are inclusive of the upper values.

| Variable     | Definition                                                                 | States                                                                                                                                                | Data source                                                                                               |
|--------------|----------------------------------------------------------------------------|-------------------------------------------------------------------------------------------------------------------------------------------------------|-----------------------------------------------------------------------------------------------------------|
| Water access | Availability, stability, and quality of the water supply to the household. | 1 - up to 10.5.<br>2 - 10.5-16.0.<br>3 - 16.0-21.5.<br>4 - 21.5-27.0.<br>5 - 27.0-32.5.<br>6 - 32.5-38.0.<br>7 - 38.0-43.5.<br>8 - greater than 43.5. | Product of the WaterDistMetre, WaterAvail, and WaterSup variables from the Agincourt Asset Status module. |

**Table 5:** Agincourt food security belief network variables on level 5 of the causal ordering. The data source specifies how the variable is calculated from the data, and the states specify how the discrete variable states relate to the values resulted from the calculations described in the data source. Value intervals are inclusive of the upper values.

| Variable              | Definition                              | States                                                                                                                                                              | Data source                                               |
|-----------------------|-----------------------------------------|---------------------------------------------------------------------------------------------------------------------------------------------------------------------|-----------------------------------------------------------|
| Socio-economic status | Socio-economic status of the household. | 1 - up to 1.262.<br>2 - 1.262-1.648.<br>3 - 1.648-2.033.<br>4 - 2.033-2.419.<br>5 - 2.419-2.804.<br>6 - 2.804-3.190.<br>7 - 3.190-3.575.<br>8 - greater than 3.575. | SESAbsolute variable from the Agincourt SES index module. |

**Table 6:** Agincourt food security belief network variables on level 6 of the causal ordering. The data source specifies how the variable is calculated from the data, and the states specify how the discrete variable states relate to the values resulted from the calculations described in the data source. Value intervals are inclusive of the upper values.

| Variable              | Definition                                                                 | States                                                      | Data source                                                                                                                                        |
|-----------------------|----------------------------------------------------------------------------|-------------------------------------------------------------|----------------------------------------------------------------------------------------------------------------------------------------------------|
| Employment level      | Number of household members with current employment.                       | 0-6+ employed household members.                            | Count of household members (membership counted at midyear) who replied yes to the CurrentlyWorking variable in the Agincourt Labour Status module. |
| Household head gender | Gender of the head of the household.                                       | 0 - male.<br>1 - female.                                    | Household head gender as specified in the Agincourt dataset.                                                                                       |
| Refugee status        | Whether any household members are refugees or non-South African nationals. | 0 - no refugee members.<br>1 - one or more refugee members. | Refugee variable from the Agincourt dataset.                                                                                                       |

**Table 7:** Level Agincourt food security belief network variables on level 7 of the causal ordering. The data source specifies how the variable is calculated from the data, and the states specify how the discrete variable states relate to the values resulted from the calculations described in the data source.



| Variable                     | Definition                                 | States                  | Data source                                                                                                                         |
|------------------------------|--------------------------------------------|-------------------------|-------------------------------------------------------------------------------------------------------------------------------------|
| Number of working age adults | Number of household members aged 15 to 59. | 1 - up to 13.29.        | Count of household members (membership counted at midyear) with appropriate age (calculated at midyear) from the Agincourt dataset. |
|                              |                                            | 2 - 13.29-26.57.        |                                                                                                                                     |
|                              |                                            | 3 - 26.57-39.86.        |                                                                                                                                     |
|                              |                                            | 4 - 39.86-53.14.        |                                                                                                                                     |
|                              |                                            | 5 - 53.14-66.43.        |                                                                                                                                     |
|                              |                                            | 6 - 66.43-79.71.        |                                                                                                                                     |
|                              |                                            | 7 - greater than 79.71. |                                                                                                                                     |

**Table 8:** Agincourt food security belief network variables on level 8 of the causal ordering. The data source specifies how the variable is calculated from the data, and the states specify how the discrete variable states relate to the values resulted from the calculations described in the data source. Value intervals are inclusive of the upper values.

| Variable        | Definition                                           | States               | Data source                                                                                                                                       |
|-----------------|------------------------------------------------------|----------------------|---------------------------------------------------------------------------------------------------------------------------------------------------|
| Education level | Average years of education by the household members. | 1 - up to 3.         | Average of the EducationInYears variable from the Agincourt Education module for household members (membership counted at midyear) for that year. |
|                 |                                                      | 2 - 3-6.             |                                                                                                                                                   |
|                 |                                                      | 3 - 6-9.             |                                                                                                                                                   |
|                 |                                                      | 4 - 9-12.            |                                                                                                                                                   |
|                 |                                                      | 5 - greater than 12. |                                                                                                                                                   |

**Table 9:** Agincourt food security belief network variables on level 9 of the causal ordering. The data source specifies how the variable is calculated from the data, and the states specify how the discrete variable states relate to the values resulted from the calculations described in the data source. Value intervals are inclusive of the upper values.

54 **2 Further results for simulations of established**  
55 **food security interventions**

56 Figures 1 to 4 show further results for the simulations performed to test the three  
57 different network structures on their ability to capture established interventions from  
58 the literature.

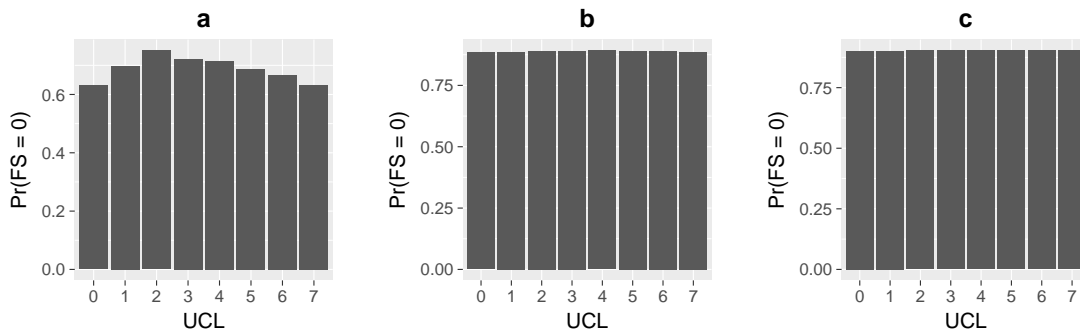

**Figure 1:** Simulations of setting the state of ‘use of crops and livestock’ (UCL) in order to alter the probability of a household being food secure ( $FS = 0$ ) on the different possible Agincourt food security belief networks. a - expert elicited structure. b - data-learned structure. c - data-learned structure with the expert network as a prior.

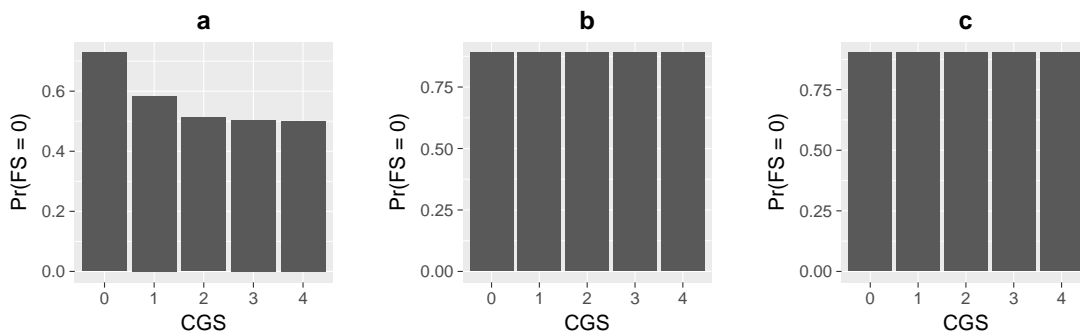

**Figure 2:** Simulations of setting the state of ‘child grant status’ (CGS) in order to alter the probability of a household being food secure ( $FS = 0$ ) on the different possible Agincourt food security belief networks. a - expert elicited structure. b - data-learned structure. c - data-learned structure with the expert network as a prior.

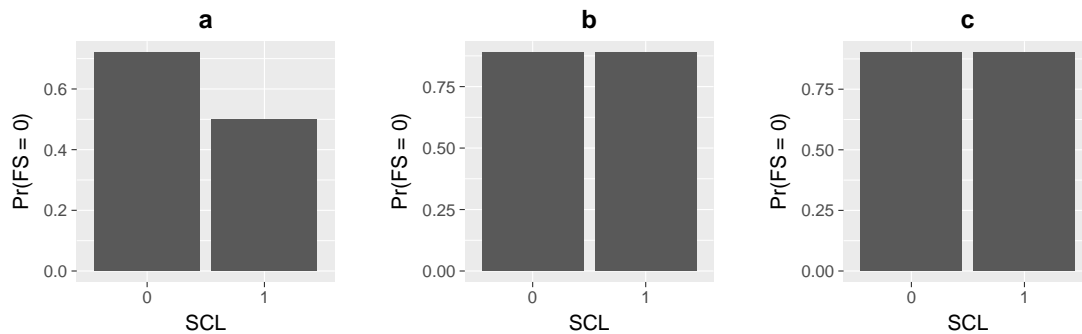

**Figure 3:** Simulations of setting the state of ‘selling of crops and livestock’ (SCL) in order to alter the probability of a household being food secure ( $FS = 0$ ) on the different possible Agincourt food security belief networks. a - expert elicited structure. b - data-learned structure. c - data-learned structure with the expert network as a prior.

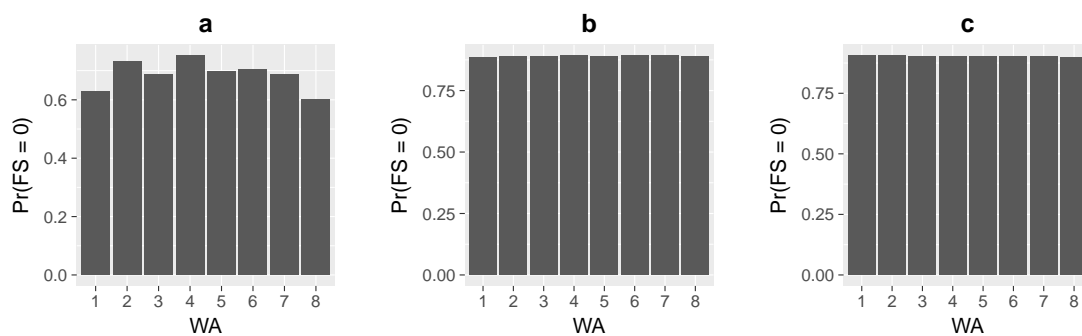

**Figure 4:** Simulations of setting the state of ‘water access’ (WA) in order to alter the probability of a household being food secure ( $FS = 0$ ) on the different possible Agincourt food security belief networks. a - expert elicited structure. b - data-learned structure. c - data-learned structure with the expert network as a prior.

### 59 3 Further results for interventional inferences

60 Figures 5 and 6 show further results for the interventional inferences performed on  
61 the three different network structures to demonstrate applications of the models.

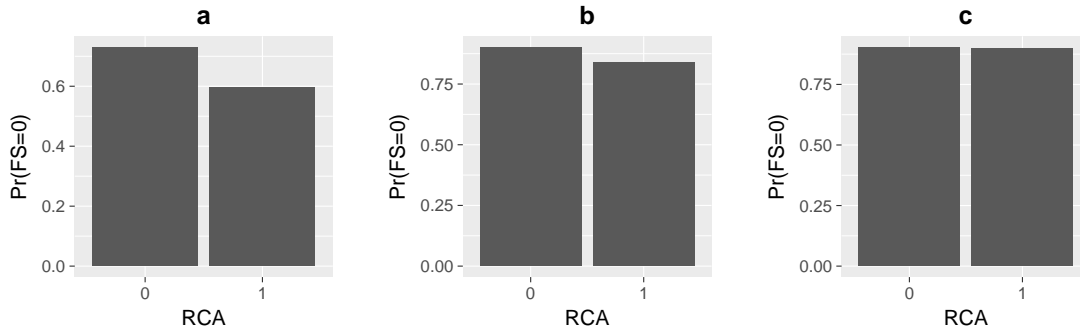

**Figure 5:** Interventional inference on the impact of ‘receipt of communal aid’ (RCA) on the probability of being food secure ( $\Pr(\text{FS} = 0)$ ). a - expert elicited network. b - data-learned network. c - data-learned network with the expert network as a prior. Depending on the network, child grants have either a negative impact or none at all on food security.

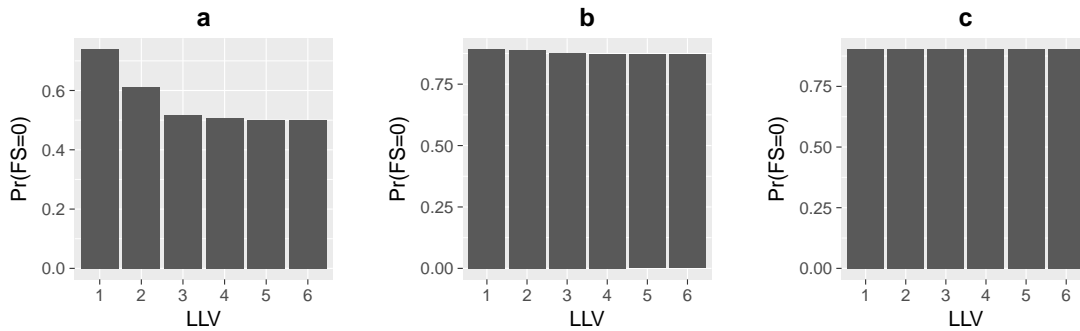

**Figure 6:** Interventional inference on the impact of ‘level of local vegetation’ (LLV) on the probability of being food secure ( $\Pr(\text{FS} = 0)$ ). a - expert elicited network. b - data-learned network. c - data-learned network with the expert network as a prior. Depending on the network, local vegetation has either a negative impact or none at all on food security.

## References

- [1] Twine W, Hunter LM. Adult mortality and household food security in rural South Africa: Does AIDS represent a unique mortality shock? *Development Southern Africa*. 2011;28(4):431–444.
- [2] South African Social Security Agency. Grants for Older Persons; 2017. Accessed: 27 October 2017. <http://www.sassa.gov.za/index.php/social-grants/grants-for-older-persons>.
- [3] Hunter LM, Twine W, Patterson L. “Locusts are now our beef”: Adult mortality and household dietary use of local environmental resources in rural South Africa. *Scandinavian Journal of Public Health*. 2007;35(69\_suppl):165–174.
- [4] Kirkland TM, Kemp RJ, Hunter LM, Twine WM. Toward improved understanding of food security: a methodological examination based in rural South Africa. *Food, Culture & Society*. 2013;16(1):65–84.
- [5] Nawrotzki RJ, Robson K, Gutilla MJ, Hunter LM, Twine W, Norlund P. Exploring the impact of the 2008 global food crisis on food security among vulnerable households in rural South Africa. *Food security*. 2014;6(2):283–297.
- [6] Pereira LM, Cuneo CN, Twine WC. Food and cash: understanding the role of the retail sector in rural food security in South Africa. *Food security*. 2014;6(3):339–357.
- [7] Kaschula S. Using people to cope with the hunger: social networks and food transfers amongst HIV/AIDS afflicted households in KwaZulu-Natal, South Africa. *AIDS and Behavior*. 2011;15(7):1490.
- [8] Lemke S, Vorster HH, van Rensburg NJ, Ziche J. Empowered women, social networks and the contribution of qualitative research: broadening our understanding of underlying causes for food and nutrition insecurity. *Public Health Nutrition*. 2003;6(8):759–764.

- 88 [9] Sedibe HM, Kahn K, Edin K, Gitau T, Ivarsson A, Norris SA. Qualitative study  
89 exploring healthy eating practices and physical activity among adolescent girls  
90 in rural South Africa. *BMC Pediatrics*. 2014;14(1):211.
- 91 [10] Dovie DB, Shackleton CM, Witkowski E. Conceptualizing the human use of  
92 wild edible herbs for conservation in South African communal areas. *Journal*  
93 *of Environmental Management*. 2007;84(2):146–156.
- 94 [11] Pronyk PM, Harpham T, Busza J, Phetla G, Morison LA, Hargreaves JR, et al.  
95 Can social capital be intentionally generated? A randomized trial from rural  
96 South Africa. *Social Science & Medicine*. 2008;67(10):1559–1570.
- 97 [12] South African Social Security Agency. Child Support Grant; 2017. Accessed:  
98 27 October 2017. [http://www.sassa.gov.za/index.php/social-grants/  
99 child-support-grant](http://www.sassa.gov.za/index.php/social-grants/child-support-grant).
- 100 [13] Twine R, Collinson MA, Polzer TJ, Kahn K. Evaluating access to a child-  
101 oriented poverty alleviation intervention in rural South Africa. *Scand J Pub*  
102 *Health*. 2007;35(69\_suppl):118–127.
